# Supplementary material
Source: publisher figshare collection journal article supplement (https://wiley.figshare.com/articles/dataset/_/3514997)
Supplement: Supplementary file 1 [file 1]

**Haridas Chirakkal and Leah R. Gerber. 2010. Short- and long-term population response to changes in vital rates: implications for demographic population viability analysis. *Ecological Applications* 20:783–788.**

## **Appendix A. Calculation of short-term elasticity.**

We follow methods outlined in Haridas and Tuljapurkar (2007) to derive the short-term elasticities. Let the current random projection matrix in year  $t$  be  $\mathbf{A}(t)$  and let this be perturbed to  $\mathbf{A}(t) + \varepsilon \mathbf{C}(t)$ , where  $\varepsilon$  is small. Let population growth rate in year  $t$  be  $\lambda(t)$  and let  $\mathbf{y}(t)$  denote age-structure vector. Then

$$\lambda(t) = |\mathbf{A}(t)\mathbf{y}(t-1)|, \quad (\text{A.1})$$

where  $|\mathbf{x}|$ , denotes the sum of elements of vector  $\mathbf{x}$ .

Let age-vector  $\mathbf{y}(t)$  change to  $\bar{\mathbf{y}}(t) = \mathbf{y}(t) + \varepsilon \mathbf{w}(t)$ , as a result of perturbing projection matrix. Then  $\bar{\mathbf{y}}(t)$  iterates as

$$\bar{\mathbf{y}}(t) = \frac{(\mathbf{A}(t) + \varepsilon \mathbf{C}(t))\bar{\mathbf{y}}(t-1)}{\bar{\lambda}(t)}, \quad (\text{A.2})$$

where

$$\begin{aligned} \bar{\lambda}(t) &= |(\mathbf{A}(t) + \varepsilon \mathbf{C}(t))\bar{\mathbf{y}}(t-1)| \\ &= \lambda(t) + \varepsilon \mu(t) + O(\varepsilon^2), \end{aligned} \quad (\text{A.3})$$

where

$$\mu(t) = |\mathbf{C}(t)\mathbf{y}(t-1) + \mathbf{A}(t)\mathbf{w}(t-1)|$$

and  $O(\varepsilon^2)$  denotes terms of order  $\varepsilon^2$  and more.

The elasticity in year  $t$  is computed as the proportional change

$$\begin{aligned} e(t) &= \lim_{\varepsilon \rightarrow 0} (\log \bar{\lambda}(t) - \log \lambda(t)) \\ &= \mu(t)/\lambda(t) \end{aligned}$$

$$= \frac{|\mathbf{C}(t)\mathbf{y}(t-1)|}{\lambda(t)} + \frac{|\mathbf{A}(t)\mathbf{w}(t-1)|}{\lambda(t)}. \quad (\text{A.4})$$

First component in the above equation is the short-term (single year) effect due to perturbing the projection matrix (i.e., increasing a vital rate or its mean/variance) keeping age-structure fixed at the observed value  $\mathbf{y}(t-1)$  at the beginning of the year. The second component is the effect due to changes in age-structure accumulated over years. If a single vital rate is perturbed, say  $A_{ij}(t)$ , then first component is simply

$$e_1(t) = \frac{C_{ij}(t)y_j(t-1)}{\lambda(t)}. \quad (\text{A.5})$$

In this paper we consider two perturbations: firstly change mean without changing variance in which case  $C_{ij}(t) = \mu_{ij}$ , the mean of the vital rate  $A_{ij}(t)$ . Secondly change variance without changing mean in which case,  $C_{ij}(t) = A_{ij}(t) - \mu_{ij}$ . Note that  $e_1(t)$  is random and changes with year but its long-run average over time converges and this limit gives the short-term stochastic elasticity discussed in the paper. Denoting this average by  $\bar{E}_1$ , we have

$$\bar{E}_1 = \lim_{T \rightarrow \infty} \left( \frac{1}{T} \right) \sum_{t=1}^T e_1(t). \quad (\text{A.6})$$

### Literature Cited

Haridas, C.V., and S. Tuljapurkar, S. 2007. Time, transients and elasticity. Ecology Letters 10:1143–1153.
